# Supplementary material for: Serum Bile Acid Profiling and Mixed Model Analysis Reveal Biomarkers Associated with Pruritus Reduction in Maralixibat-Treated Patients with BSEP Deficiency
Source: MDPI journal article supplement (doi:10.3390/metabo12100952), 2022-10-06
Supplement: s1 [file s1]

**Supplemental Table S1.** Levels of serum bile acid in patients with non-truncating BSEP following 72 weeks of maralixbat treatment compared with baseline

| BA<br>Hydrophobicity | BA<br>species | Nonresponders                            |                                         |                          | Responders                                |                                            |                      |
|----------------------|---------------|------------------------------------------|-----------------------------------------|--------------------------|-------------------------------------------|--------------------------------------------|----------------------|
|                      |               | Baseline conc.<br>( $\mu\text{M}$ ; n=8) | Week 72 conc.<br>( $\mu\text{M}$ ; n=6) | p-<br>value <sup>a</sup> | Baseline conc.<br>( $\mu\text{M}$ ; n=11) | Week 72<br>conc. ( $\mu\text{M}$ ;<br>n=9) | p-value <sup>a</sup> |
| Hydrophilic          | TCA           | 36.80 $\pm$ 19.87                        | 60.48 $\pm$ 29.46                       | NS                       | 48.38 $\pm$ 35.60                         | 29.07 $\pm$ 49.14                          | NS                   |
|                      | TUDCA         | 14.63 $\pm$ 6.88                         | 22.26 $\pm$ 15.07                       | NS                       | 10.16 $\pm$ 8.25                          | 6.70 $\pm$ 15.32                           | NS                   |
|                      | TCDC A        | 16.15 $\pm$ 10.30                        | 34.62 $\pm$ 32.67                       | NS                       | 18.14 $\pm$ 14.03                         | 17.27 $\pm$ 32.10                          | NS                   |
|                      | GCA           | 144.64 $\pm$ 59.79                       | 154.33 $\pm$ 41.41                      | NS                       | 134.47 $\pm$ 82.70                        | 64.06 $\pm$ 71.16                          | 0.06                 |
|                      | GUDCA         | 108.72 $\pm$ 38.62                       | 140.63 $\pm$ 83.33                      | NS                       | 63.80 $\pm$ 57.55                         | 28.19 $\pm$ 27.91                          | 0.09                 |
|                      | GCDCA         | 81.87 $\pm$ 42.15                        | 119.62 $\pm$ 57.63                      | NS                       | 71.29 $\pm$ 47.69                         | 49.15 $\pm$ 45.59                          | NS                   |
|                      | CA            | 0.08 $\pm$ 0.05                          | 0.08 $\pm$ 0.04                         | NS                       | 0.08 $\pm$ 0.04                           | 0.06 $\pm$ 0.00                            | NS                   |
|                      | UDCA          | 2.13 $\pm$ 2.18                          | 2.74 $\pm$ 2.46                         | NS                       | 2.20 $\pm$ 3.18                           | 1.17 $\pm$ 2.11                            | NS                   |
|                      | CDCA          | 0.06 $\pm$ 0.00                          | 0.07 $\pm$ 0.02                         | NS                       | 0.06 $\pm$ 0.00                           | 0.13 $\pm$ 0.09                            | 0.06                 |
|                      | TOTAL         | 405.09 $\pm$ 134.96                      | 534.83 $\pm$ 155.37                     | NS                       | 348.58 $\pm$ 183.29                       | 195.79 $\pm$ 202.11                        | 0.098                |
| Hydrophobic          | TDCA          | 0.05 $\pm$ 0.00                          | 0.06 $\pm$ 0.02                         | NS                       | 0.62 $\pm$ 1.21                           | 0.12 $\pm$ 0.17                            | NS                   |
|                      | TLCA          | 0.05 $\pm$ 0.00                          | 0.06 $\pm$ 0.01                         | NS                       | 0.05 $\pm$ 0.00                           | 0.05 $\pm$ 0.00                            | NS                   |
|                      | GDCA          | 0.06 $\pm$ 0.00                          | 0.07 $\pm$ 0.03                         | NS                       | 1.34 $\pm$ 3.02                           | 0.23 $\pm$ 0.36                            | NS                   |
|                      | GLCA          | 0.06 $\pm$ 0.00                          | 0.07 $\pm$ 0.02                         | NS                       | 0.06 $\pm$ 0.00                           | 0.06 $\pm$ 0.00                            | NS                   |
|                      | DCA           | 0.06 $\pm$ 0.00                          | 0.07 $\pm$ 0.02                         | NS                       | 0.07 $\pm$ 0.02                           | 0.13 $\pm$ 0.18                            | NS                   |
|                      | LCA           | 0.06 $\pm$ 0.00                          | 0.07 $\pm$ 0.02                         | NS                       | 0.06 $\pm$ 0.00                           | 0.06 $\pm$ 0.00                            | NS                   |
|                      | TOTAL         | 0.35 $\pm$ 0.00                          | 0.41 $\pm$ 0.10                         | NS                       | 2.20 $\pm$ 4.19                           | 0.65 $\pm$ 0.49                            | NS                   |

<sup>a</sup>p < 0.10 was considered to be statistically significant given dataset limitations

BA, bile acid; BSEP, bile salt export pump; CA, cholic acid; CDCA, chenodeoxycholic acid;

DCA, deoxycholic acid; LCA, lithocholic acid; GCA, glycine-conjugated cholic acid;

GCDCA, glycochenodeoxycholic acid; GDCA, glycodeoxycholic acid;

GLCA, glycolithocholic acid; GUDCA, glyoursodeoxycholic acid; NS, non-significant;

TCA, taurine-conjugated cholic acid; TCDC A, taurochenodeoxycholic acid;

TDCA, taurodeoxycholic acid; TLCA, tauroolithocholic acid; TUDCA, taurooursodeoxycholic acid; UDCA, ursodeoxycholic acid

Data are mean  $\pm$  standard deviation. The two-tailed Student's t-test was used to compare groups.

**Supplemental Table S2.** Total BA as biomarker – model optimization

| <b>Fix effect</b>                                               | <b>Random effect</b>     | <b>AIC</b> | <b>BIC</b> | <b>Random effect<br/>residual variance</b> |
|-----------------------------------------------------------------|--------------------------|------------|------------|--------------------------------------------|
| 1 + Week + Age +<br>Gender +<br>Predictor_baseline<br>+Total_BA | 1 + Week  <br>Subject_ID | 203.1      | 231.0      | 0.1279                                     |
| 1 + Week + Gender +<br>Predictor_baseline<br>+Total_BA          | 1 + Week  <br>Subject_ID | 200.3      | 225.4      | 0.1278                                     |
| 1 + Week + Age +<br>Predictor_baseline<br>+Total_BA             | 1 + Week  <br>Subject_ID | 200.1      | 225.3      | 0.1279                                     |
| 1 + Week + Age +<br>Gender + Total_BA                           | 1 + Week  <br>Subject_ID | 201.1      | 226.3      | 0.1278                                     |

**Supplemental Table S3.** Likelihood-ratio test for reduced model excluding age, gender, and pre-dose baseline vs. full model

| LMM model                                                                                                                        | npar | AIC    | BIC    | logLik  | deviance | Chisq | Df | Pr(>Chisq) |
|----------------------------------------------------------------------------------------------------------------------------------|------|--------|--------|---------|----------|-------|----|------------|
| `ItchRO Weekly<br>Average Score` ~ 1 +<br>Week + Total_BA + (1 +<br>Week   Subject_ID)                                           | 7    | 197.81 | 217.38 | -91.905 | 183.81   |       |    |            |
| `ItchRO Weekly<br>Average Score` ~ 1 +<br>Week + Age +<br>Predictor_baseline +<br>Gender + Total_BA + (1<br>+ Week   Subject_ID) | 10   | 202.06 | 230.02 | -91.030 | 182.06   | 1.751 | 3  | 0.6257     |

**Supplemental Table S4.** Summary of linear mixed model (LMM) of pruritus ItchRO score ~ UDCA (%)

| Predictors                                           | ItchRO_score |               |                   |
|------------------------------------------------------|--------------|---------------|-------------------|
|                                                      | Estimates    | CI            | p-value           |
| (Intercept)                                          | 1.79         | 1.46 – 2.12   | <b>&lt; 0.001</b> |
| Week                                                 | -0.01        | -0.01 – -0.00 | <b>0.001</b>      |
| UDCA                                                 | -0.03        | -0.05 – -0.01 | <b>0.002</b>      |
| <b>Random Effects</b>                                |              |               |                   |
| $\sigma^2$                                           |              | 0.14          |                   |
| $\tau_{00}$ Patient_id                               |              | 0.47          |                   |
| $\tau_{11}$ Patient_id.Week                          |              | 0.00          |                   |
| $Q_{01}$ Patient_id                                  |              | -0.13         |                   |
| ICC                                                  |              | 0.80          |                   |
| N Patient_id                                         |              | 19            |                   |
| Observations                                         |              | 121           |                   |
| Marginal R <sup>2</sup> / Conditional R <sup>2</sup> |              | 0.139 / 0.828 |                   |

\*Significant p-values, i.e. at 0.05 level, are highlighted in bold.

**Supplemental Table S5.** Summary of linear mixed model (LMM) of pruritus ItchRO score ~ GCA (%)

| Predictors                                           | ItchRO_score |               |                |
|------------------------------------------------------|--------------|---------------|----------------|
|                                                      | Estimates    | CI            | p-value        |
| (Intercept)                                          | 0.97         | 0.54 – 1.40   | < <b>0.001</b> |
| Week                                                 | -0.01        | –0.01 – –0.00 | <b>0.006</b>   |
| GCA                                                  | 0.02         | 0.01 – 0.03   | < <b>0.001</b> |
| <b>Random Effects</b>                                |              |               |                |
| $\sigma^2$                                           |              | 0.12          |                |
| $\tau_{00}$ Patient_id                               |              | 0.45          |                |
| $\tau_{11}$ Patient_id.Week                          |              | 0.00          |                |
| $Q_{01}$ Patient_id                                  |              | –0.33         |                |
| ICC                                                  |              | 0.81          |                |
| N Patient_id                                         |              | 19            |                |
| Observations                                         |              | 121           |                |
| Marginal R <sup>2</sup> / Conditional R <sup>2</sup> |              | 0.229 / 0.853 |                |

\*Significant p-values, i.e. at 0.05 level, are highlighted in bold.

**Supplemental Table S6.** Summary of linear mixed model (LMM) of pruritus ItchRO score ~ TCA (%)

| Predictors                                           | ItchRO_score |               |                  |
|------------------------------------------------------|--------------|---------------|------------------|
|                                                      | Estimates    | CI            | p-value          |
| (Intercept)                                          | 1.32         | 0.93 – 1.71   | <b>&lt;0.001</b> |
| Week                                                 | -0.01        | -0.02 – -0.00 | <b>&lt;0.001</b> |
| TCA                                                  | 0.04         | 0.02 – 0.06   | <b>&lt;0.001</b> |
| <b>Random Effects</b>                                |              |               |                  |
| $\sigma^2$                                           |              | 0.14          |                  |
| $\tau_{00}$ Patient_id                               |              | 0.44          |                  |
| $\tau_{11}$ Patient_id.Week                          |              | 0.00          |                  |
| $Q_{01}$ Patient_id                                  |              | -0.37         |                  |
| ICC                                                  |              | 0.76          |                  |
| N Patient_id                                         |              | 19            |                  |
| Observations                                         |              | 121           |                  |
| Marginal R <sup>2</sup> / Conditional R <sup>2</sup> |              | 0.226 / 0.815 |                  |

\*Significant p-values, i.e. at 0.05 level, are highlighted in bold.

**Supplemental Table S7.** Summary of general linear mixed model (GLMM) of pruritus responder class ~ GCA (%)

| Pruritus responder                                   |             |               |         |
|------------------------------------------------------|-------------|---------------|---------|
| Predictors                                           | Odds Ratios | CI            | p-value |
| (Intercept)                                          | 0.00        | 0.00 – 973.31 | 0.274   |
| Week                                                 | 0.93        | 0.74 – 1.16   | 0.527   |
| GCA                                                  | 0.88        | 0.58 – 1.33   | 0.548   |
| <b>Random Effects</b>                                |             |               |         |
| $\sigma^2$                                           |             | 3.29          |         |
| $\tau_{00}$ Patient_id                               |             | 375.26        |         |
| $\tau_{11}$ Patient_id.Week                          |             | 24.83         |         |
| $\rho_{01}$ Patient_id                               |             | −0.84         |         |
| ICC                                                  |             | 1.00          |         |
| N Patient_id                                         |             | 19            |         |
| Observations                                         |             | 121           |         |
| Marginal R <sup>2</sup> / Conditional R <sup>2</sup> |             | 0.000 / 1.000 |         |

**Supplemental Table S8.** Summary of general linear mixed model (GLMM) of pruritus responder class ~ ratio of total cholic acids/total chenodeoxycholic acids

| Predictors                         | Pruritus_responding |               |              |
|------------------------------------|---------------------|---------------|--------------|
|                                    | Odds Ratios         | CI            | p-value      |
| (Intercept)                        | 0.00                | 0.00 – 0.75   | <b>0.044</b> |
| Week                               | 0.94                | 0.75 – 1.17   | 0.564        |
| Total CA/CDCA ratio                | 0.22                | 0.01 – 8.12   | 0.411        |
| <b>Random Effects</b>              |                     |               |              |
| $\sigma^2$                         |                     | 3.29          |              |
| $\tau_{00}$ Patient_id             |                     | 429.46        |              |
| $\tau_{11}$ Patient_id.Week        |                     | 27.69         |              |
| $Q_{01}$ Patient_id                |                     | -0.85         |              |
| ICC                                |                     | 1.00          |              |
| $N$ Patient_id                     |                     | 19            |              |
| Observations                       |                     | 121           |              |
| Marginal $R^2$ / Conditional $R^2$ |                     | 0.000 / 1.000 |              |

\*Significant p-values, i.e. at 0.05 level, are highlighted in bold.
